# Supplementary material
Source: PubMed Central journal article supplement (PMC3423170)

# Appendix 2

The following six figures represent the decomposition estimates graphically. Solid lines represent the unadjusted rates, and dotted and dashed lines represent the estimated rate for Whites as covariates are adjusted to the values for Black and Hispanic, respectively.

Note: The order the variables appear on the x-axis is roughly alphabetical, not the order in which the estimates were “adjusted” in the algorithm. Appendix 1 and the manuscript outline that the order in which the variables are “adjusted” will affect the calculated estimates, and therefore in each replication the order of adjustment is varied.

# Probability of Discharge to Institution

## Joint Replacement

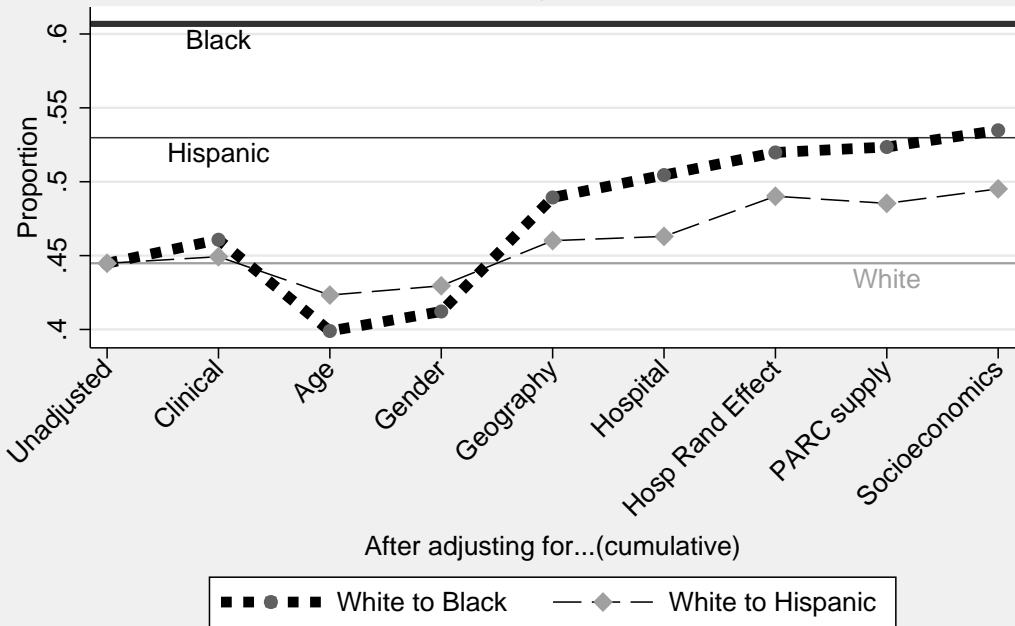

# Probability of Discharge to Institution

## Stroke

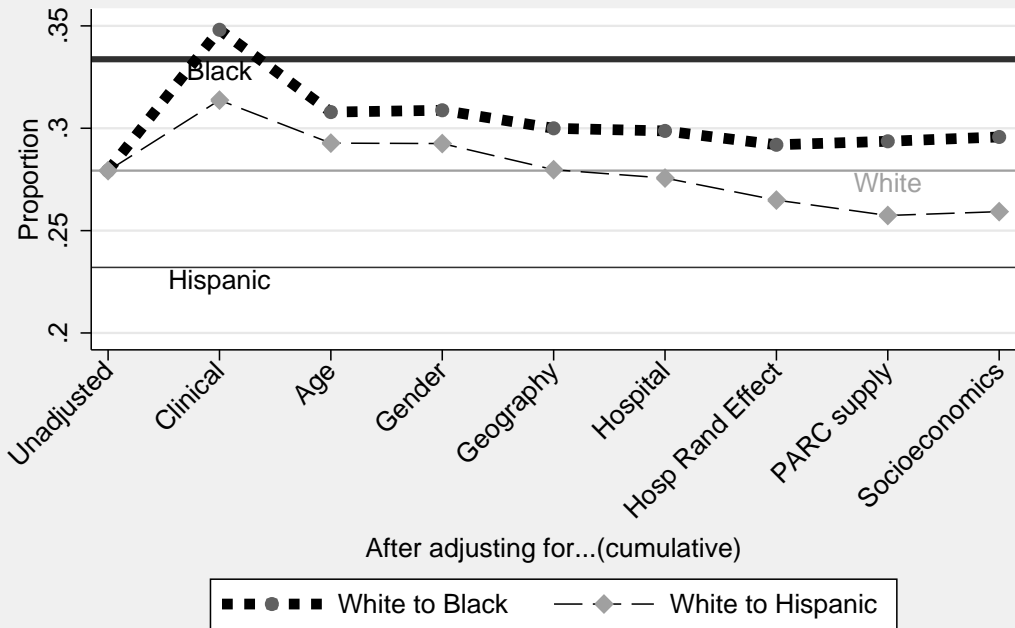

# Probability of Discharge to Institution

## Hip Fracture

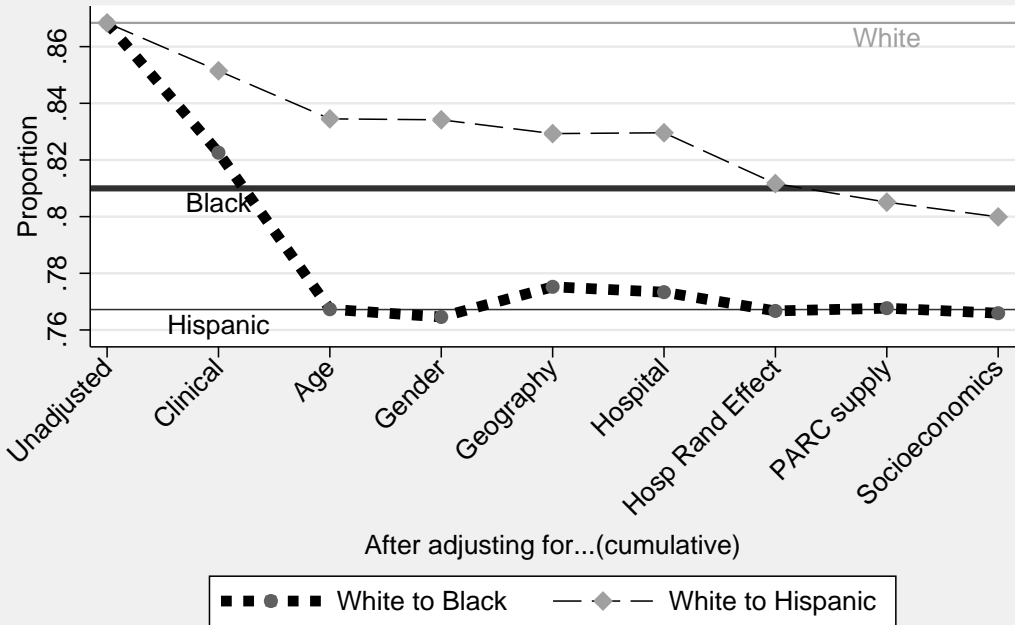

# Probability of Discharge to SNF (vs. IRF)

## Joint Replacement

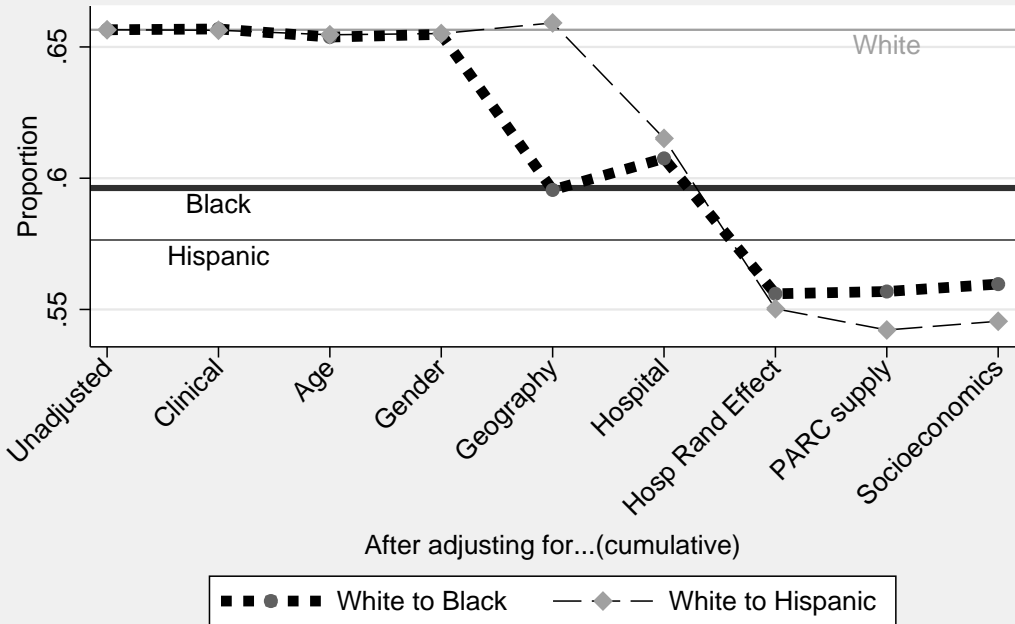

# Probability of Discharge to SNF (vs. IRF)

## Stroke

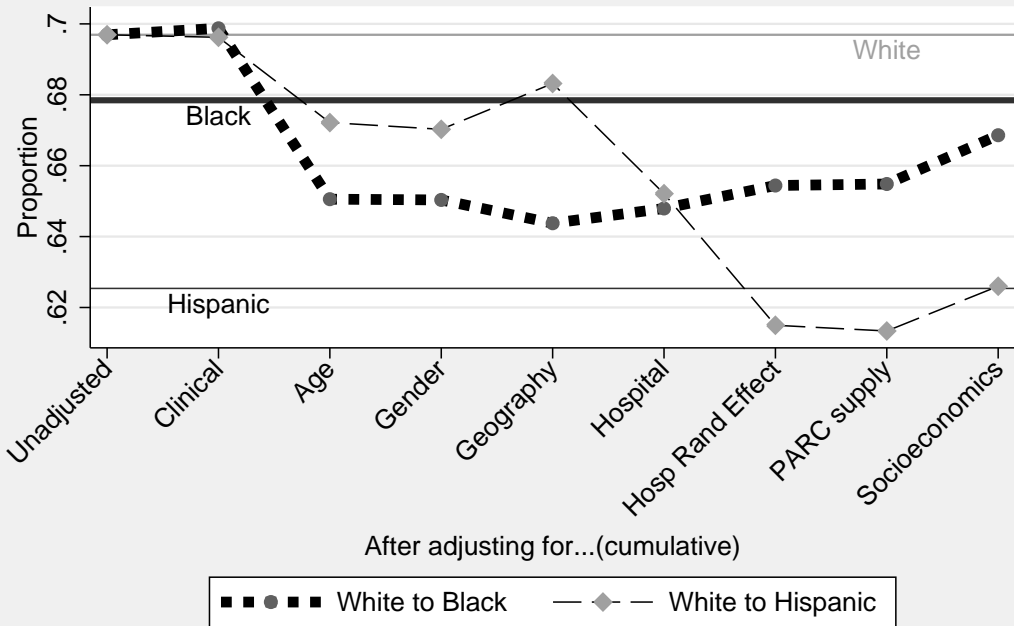

# Probability of Discharge to SNF (vs. IRF)

## Hip Fracture

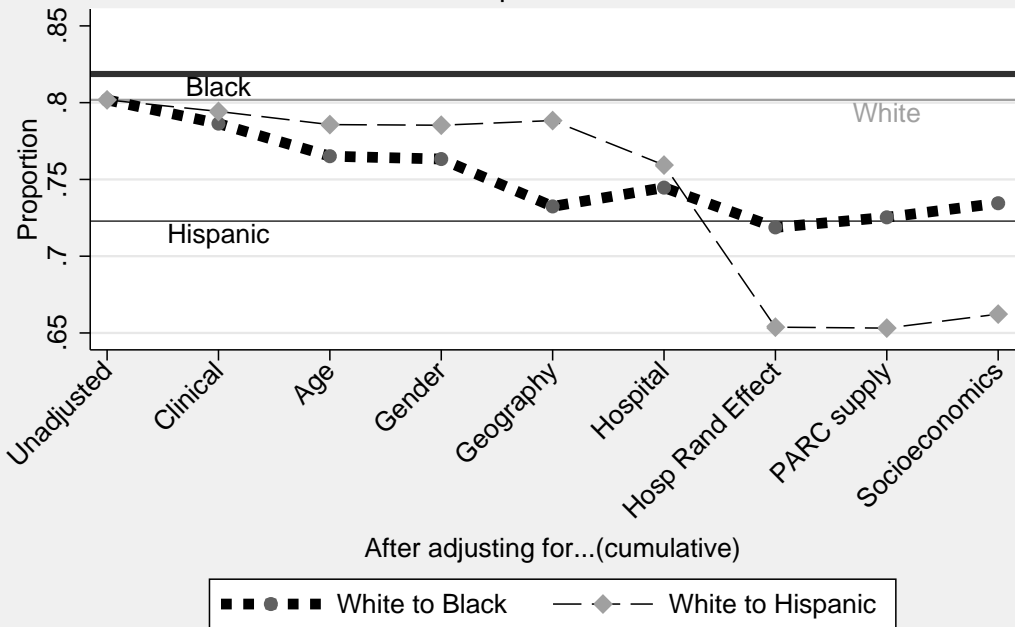

Supplement: hesr0047-1158-SD3.pdf [file hesr0047-1158-SD3.pdf]
